# Supplementary material for: Comprehensive investigation of novel pore-graded gas diffusion layers for high-performance and cost-effective proton exchange membrane electrolyzers
Source: Royal Society of Chemistry journal article supplement (doi:10.1039/c7ee01240c), 2017-01-01
Supplement: c7ee01240c1.pdf [file c7ee01240c1.pdf]

## Supporting information

### **Comprehensive Investigation of Novel Pore-Graded Gas Diffusion Layers for High-Performance and Cost-Effective Proton Exchange Membrane Electrolyzers**

P. Lettenmeier<sup>1</sup>, S. Kolb<sup>1</sup>, N. Sata<sup>1</sup>, A. Fallisch<sup>2</sup>, L. Zielke<sup>3</sup>, S. Thiele<sup>3</sup>, A. S. Gago<sup>\*,1</sup>, K. A. Friedrich<sup>1,4</sup>

*<sup>1</sup>Institute of Engineering Thermodynamics, German Aerospace Center, Pfaffenwaldring 38-40, Stuttgart, 70569, Germany*

*<sup>2</sup>Fraunhofer-Institut für Solare Energiesysteme ISE Heidenhofstrasse 2, Freiburg, 79110, Germany*

*<sup>3</sup>Laboratory for MEMS Applications, University of Freiburg, Georges Koehler Allee 103, 79110 Freiburg, Germany*

*<sup>4</sup>Institute for Energy Storage, University of Stuttgart, Keplerstraße 7, 70550, Stuttgart, Germany*

\*E-mail: [aldo.gago@dlr.de](mailto:aldo.gago@dlr.de)

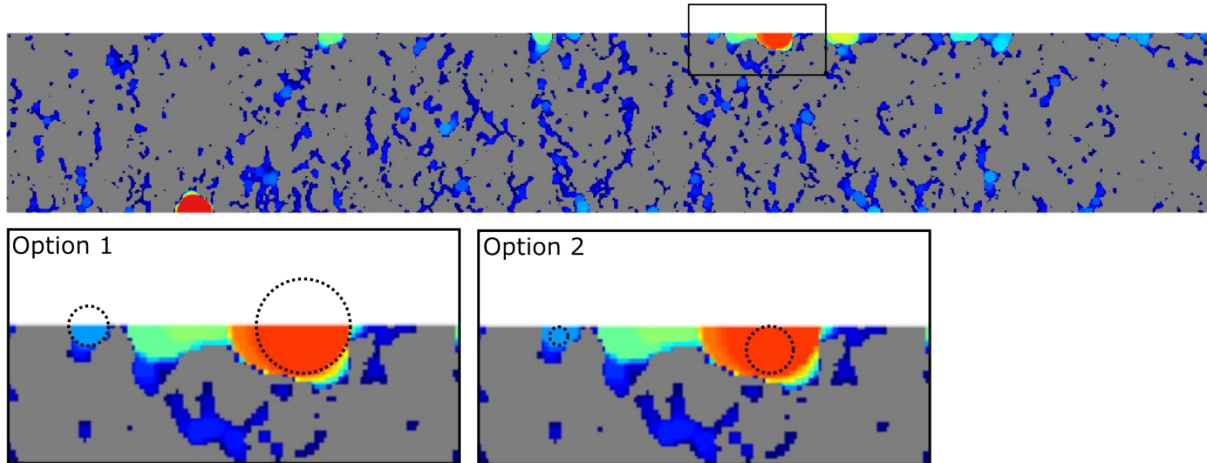

Figure S1. Schematic X-Ray CT cross-section images analysis of the 16S sample with local pore radii inscribed.

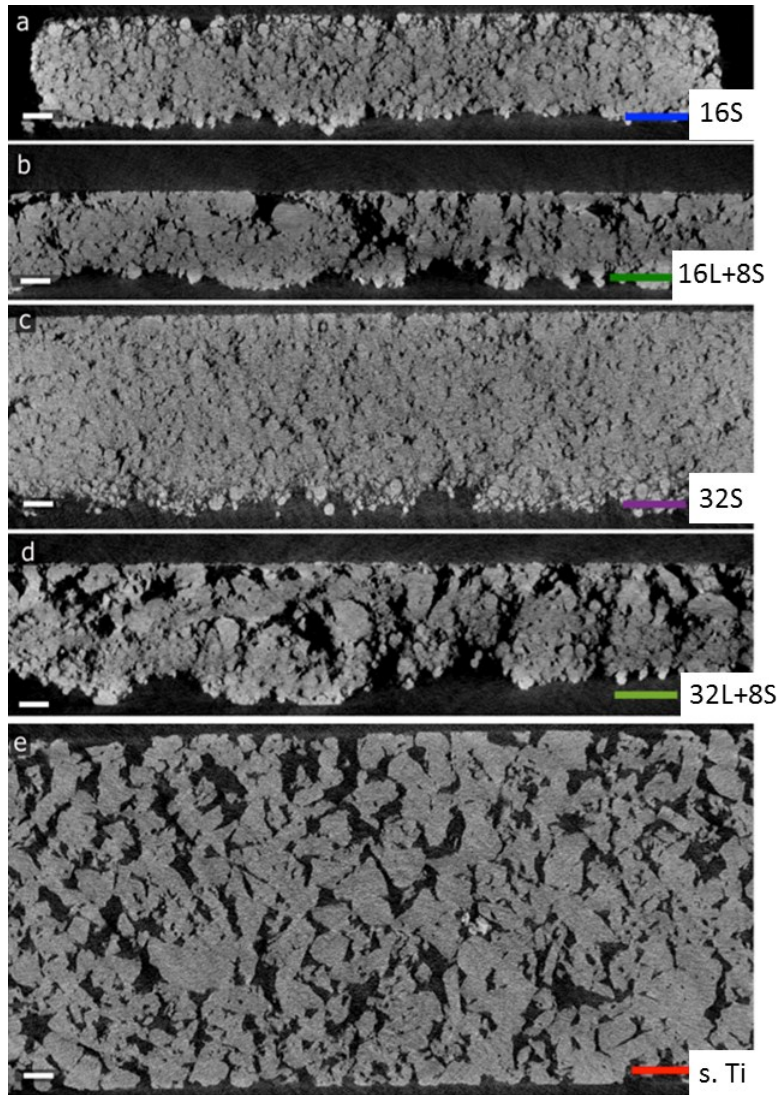

Figure S2. X-ray CT cross-section images of a) 16S, b) 16L+8S, c) 32S, d) 32L+8S and e) sintered Ti.

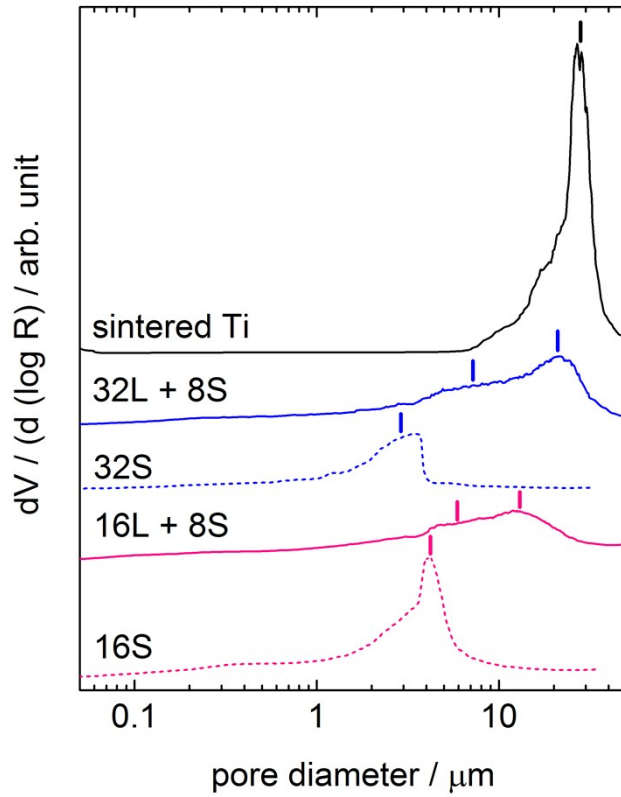

Figure S3. Mercury intrusion porosimetry characteristics up to 200 MPa of the PTLs: 16S, 32S, 16L+8S, 32L+8S and sintered Ti plate. The short bars on top of peaks correspond to the pore diameters (position in x-axis) calculated from the Gaussian fittings. In the case of the pore-graded PTLs, separate Gaussian fittings were used for the Ti45 and T125 regions.

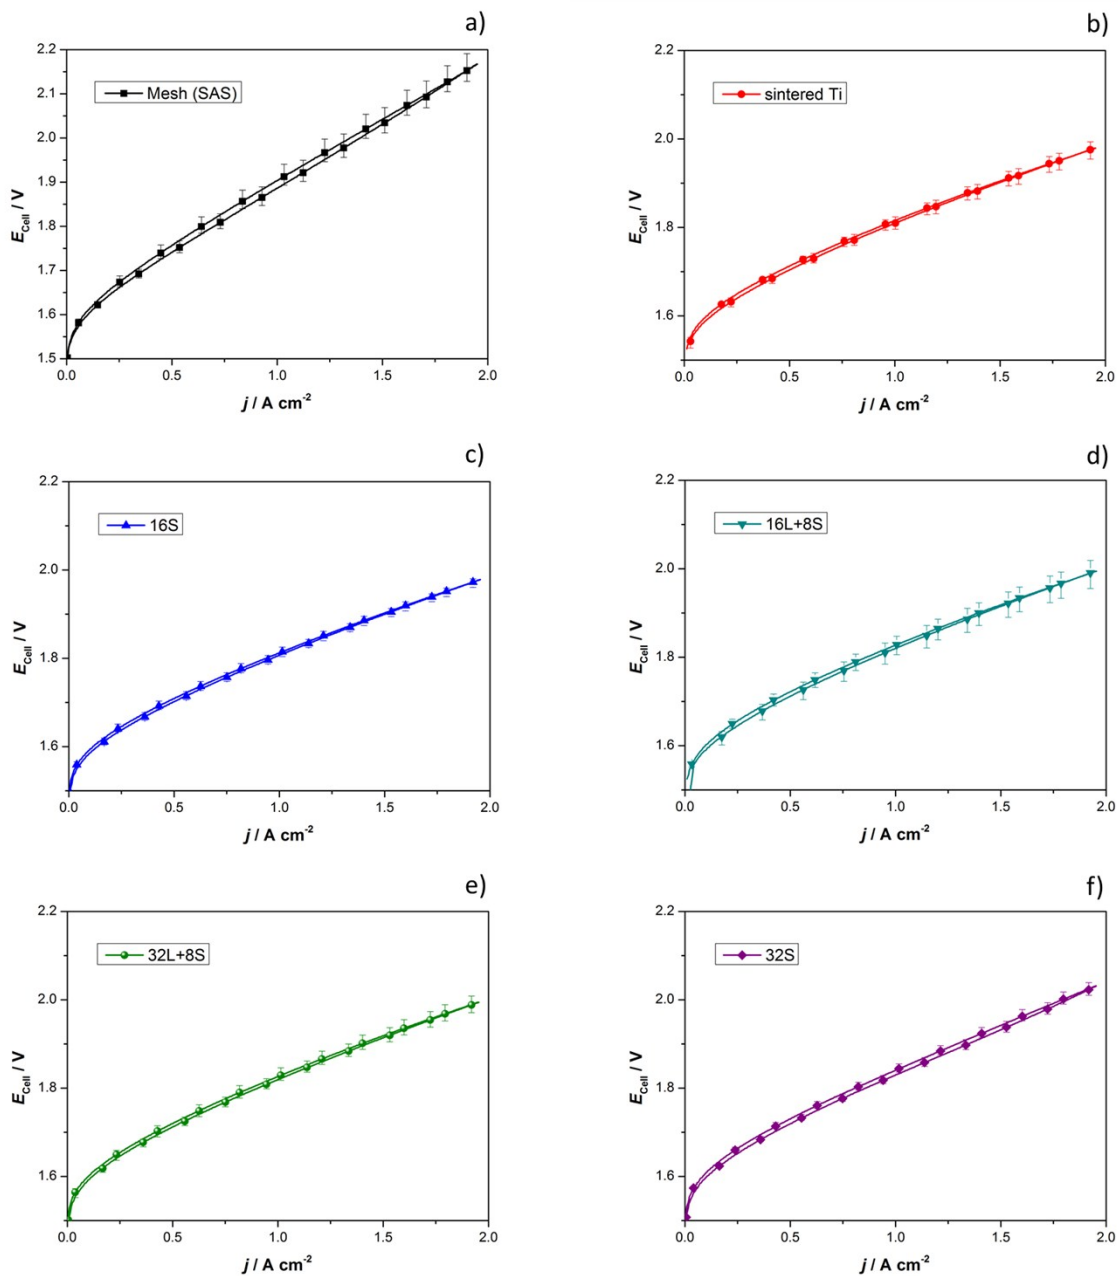

Figure S4. Polarization curves of the 4  $\text{cm}^2$  active area 2-cell PEM electrolyzer with the GDLs: a) SAS mesh; b) sintered Ti; c) 16S; d) 16S + 8S; e) 32L+8S and f) 32S.

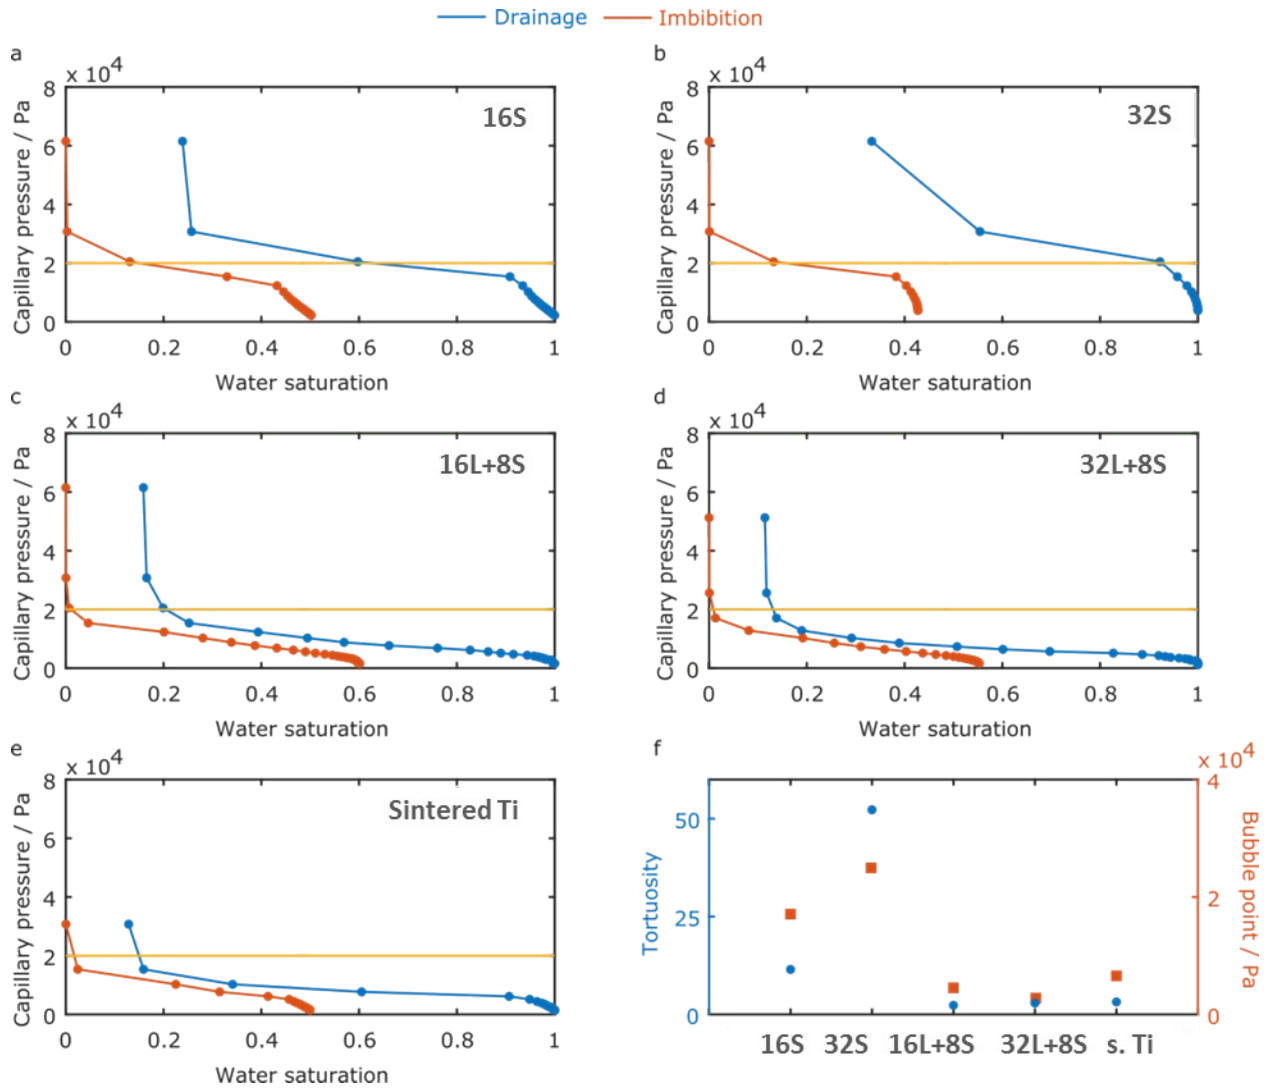

Figure S5. a-e) Drainage (blue) and imbibition (red) simulation results for the 5 investigated GDLs. The orange line is an optical guide for comparison and is located at 20 kPa. f) Bubble point and tortuosity.
